# Supplementary material for: Loliolide in Sargassum horneri Alleviates Ultrafine Urban Particulate Matter (PM 0.1)-Induced Inflammation in Human RPE Cells
Source: MDPI journal article supplement (doi:10.3390/ijms25010162), 2023-12-21
Supplement: s1 [file s1]

Table 1. Sequences of the primers for RT-PCR

| Primer              | Sequence                         |
|---------------------|----------------------------------|
| Human GAPDH         | F: 5'-CCACTCCTCCACCTTTGAC-3'     |
|                     | R: 5'-ACCCTGTTGCTGTAGCCA-3'      |
| Human 18s rRNA      | F: 5'-ATCACCATTATGCAGAATCCACG-3' |
|                     | R: 5'-GACCTGGCTGTATTTTCCATCC-3'  |
| Human MCP-1         | F: 5'-CCCCAGTCACCTGCTGTTAT-3'    |
|                     | R: 5'-GCTTCTTTGGGACACTTGCT-3'    |
| Human IL-8          | F: 5'-TTTTGCCAAGGAGTGCTAAA-3'    |
|                     | R: 5'-CTCTGCACCCAGTTTTTCCTT-3'   |
| Human IL-1 $\beta$  | F: 5'-GGGACAGGATATGGAGCAACA-3'   |
|                     | R: 5'-TTTCAACACGCAGGACAGGTA-3'   |
| Human IL-6          | F: 5'-ACTTTCACTTAAGACCCAGGGA-3'  |
|                     | R: 5'-AGTGTTGAGATGATGCTTTGACA-3' |
| Human TNF- $\alpha$ | F: 5'-TGGCGTGGAGCTGAGAGATAA-3'   |
|                     | R: 5'-TTGATGGCAGAGAGGAGGTTGA-3'  |
