# Supplementary material for: Loliolide in Sargassum horneri Alleviates Ultrafine Urban Particulate Matter (PM 0.1)-Induced Inflammation in Human RPE Cells
Source: MDPI journal article supplement (doi:10.3390/ijms25010162), 2023-12-21
Supplement: s1 [file s1]

## List of Supplementary data

|                                                                                                                                |   |
|--------------------------------------------------------------------------------------------------------------------------------|---|
| <b>Figure S1.</b> HR-ESI-QTOF/MS mass spectrum of (–)-loliolide.....                                                           | 3 |
| <b>Figure S2.</b> <sup>1</sup> H NMR (500 MHz) spectrum of (–)-loliolide .....                                                 | 4 |
| <b>Figure S3.</b> <sup>13</sup> C NMR (125 MHz) spectrum of (–)-loliolide .....                                                | 5 |
| <b>Figure S4.</b> Effect of loliolide on mRNA expression levels of inflammation marker in uf-UPs-treated<br>ARPE-19 cells..... | 6 |

1: TOF MS ES+

$1.51 \times 10^4$

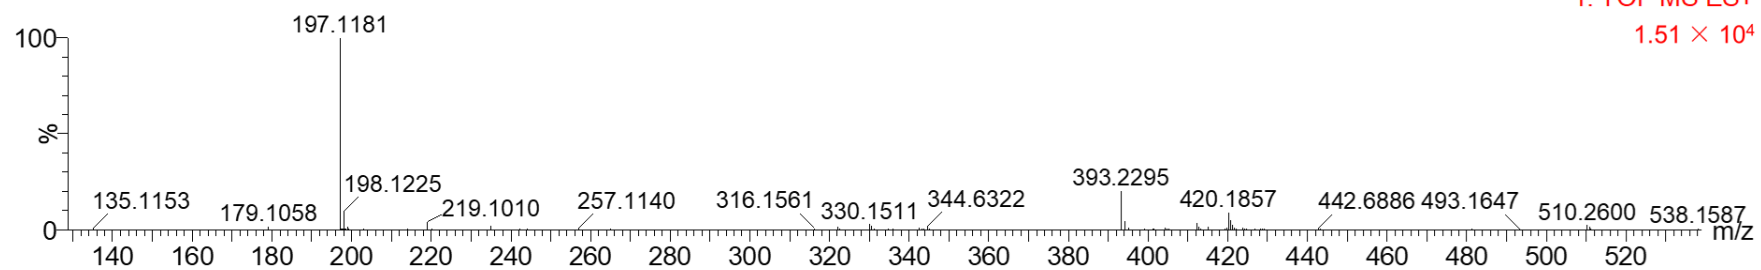

| Mass     | Calc. Mass | mDa | PPM | DBE | Formula    | i-FIT | i-FIT Norm | Fit Conf % | C  | H  | N | O |
|----------|------------|-----|-----|-----|------------|-------|------------|------------|----|----|---|---|
| 197.1181 | 197.1178   | 0.3 | 1.5 | 3.5 | C11 H17 O3 | 147.3 | 2.569      | 7.66       | 11 | 17 |   | 3 |

**Figure S1.** HR-ESI-QTOF/MS mass spectrum of (-)-loliolide.

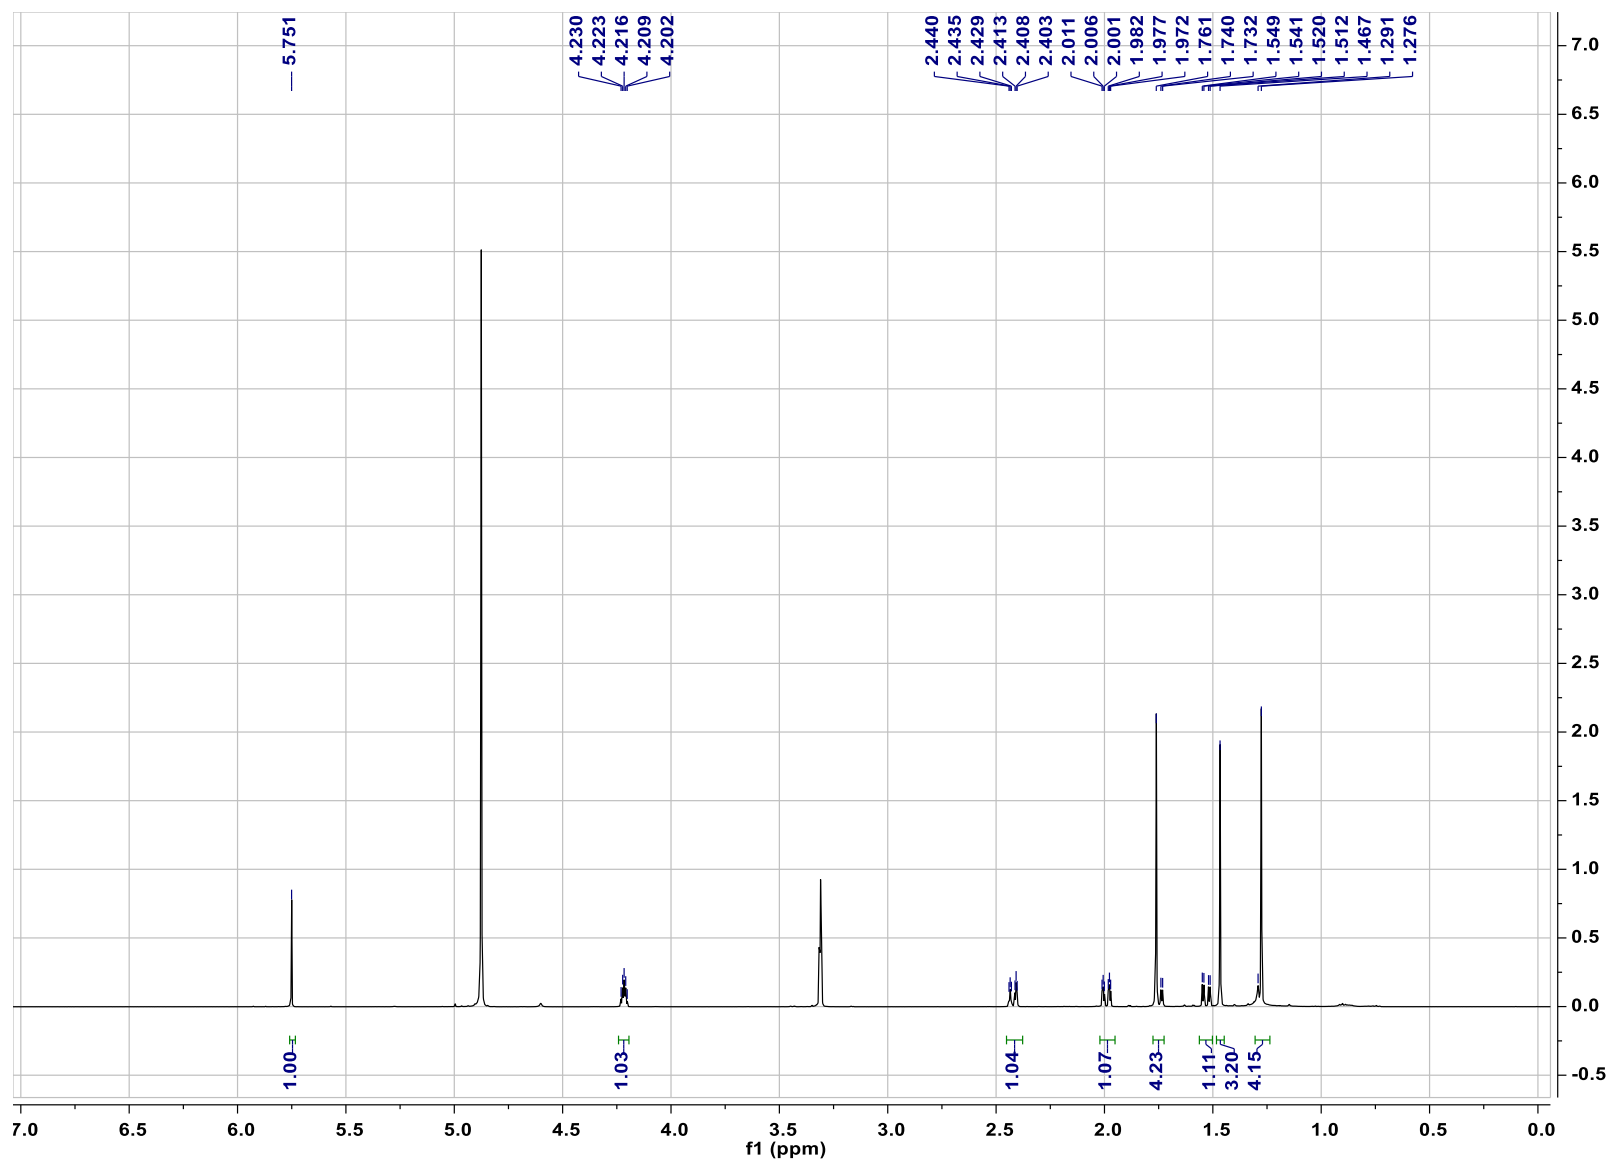

**Figure S2.**  $^1\text{H}$  NMR (500 MHz) spectrum of (-)-loliolide.

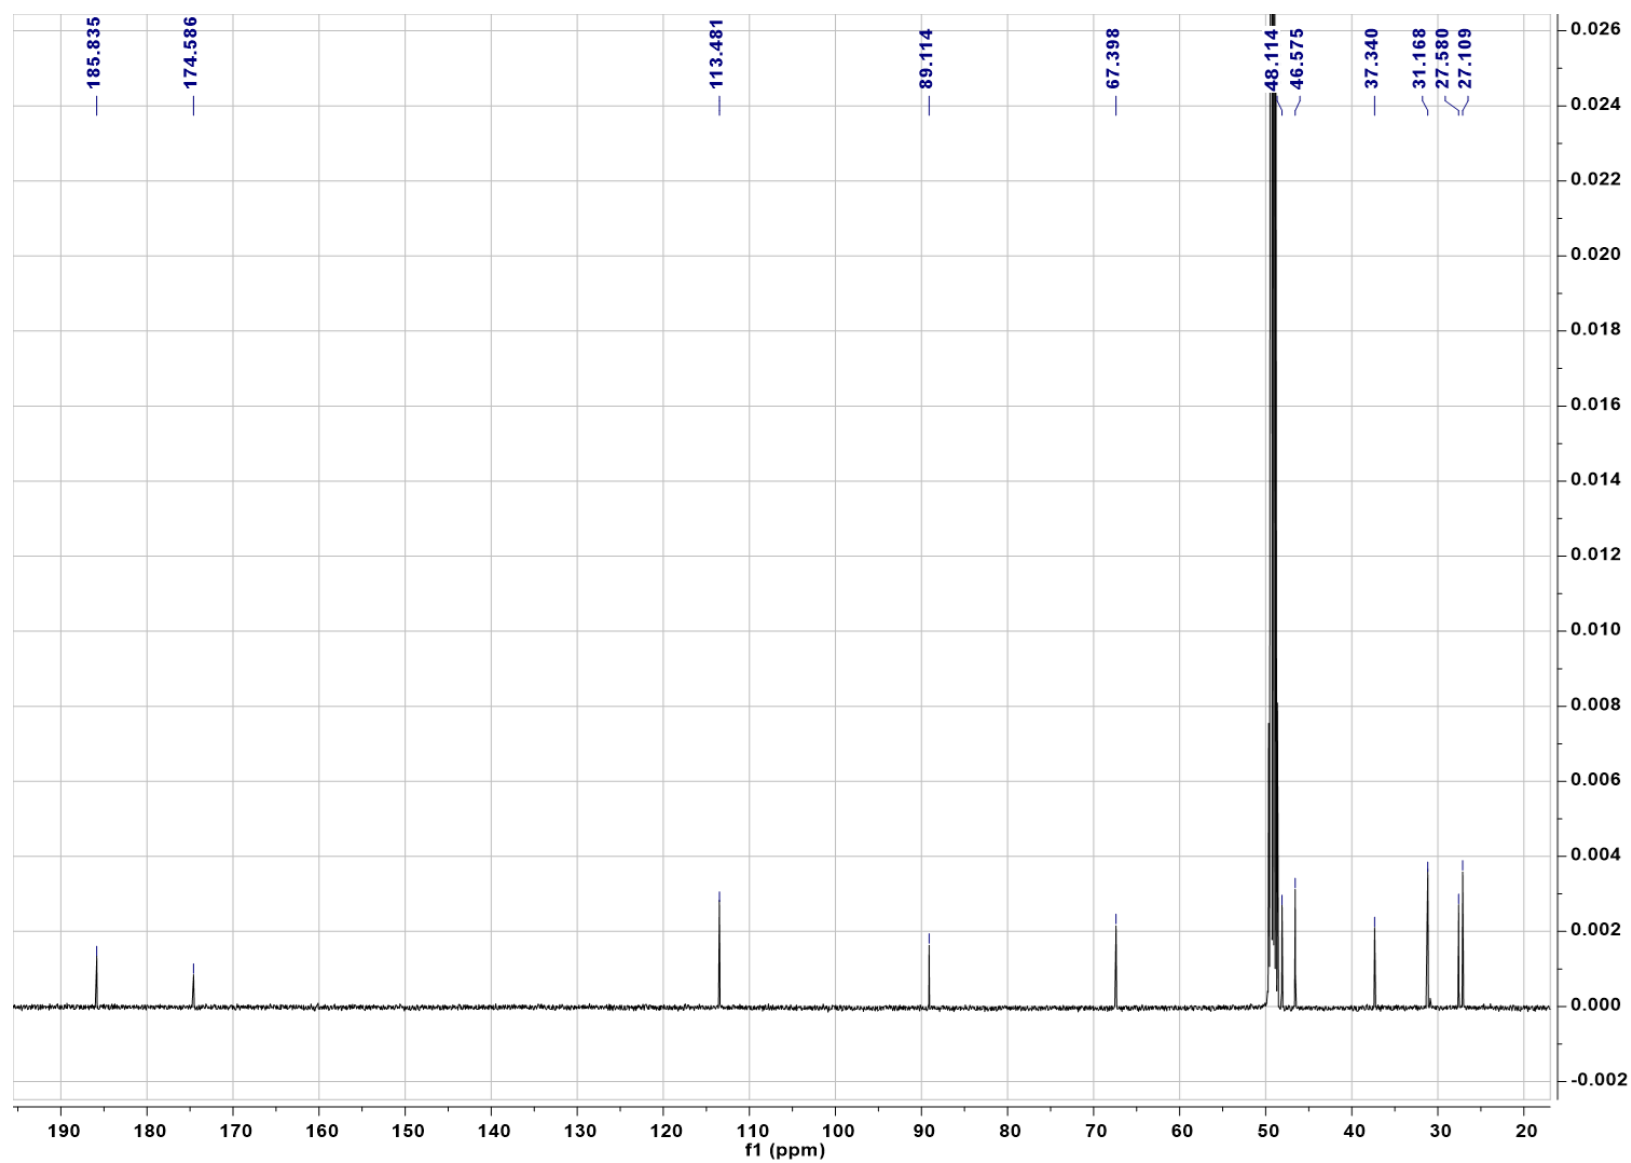

**Figure S3.**  $^{13}\text{C}$  NMR (125 MHz) spectrum of (-)-loliolide.

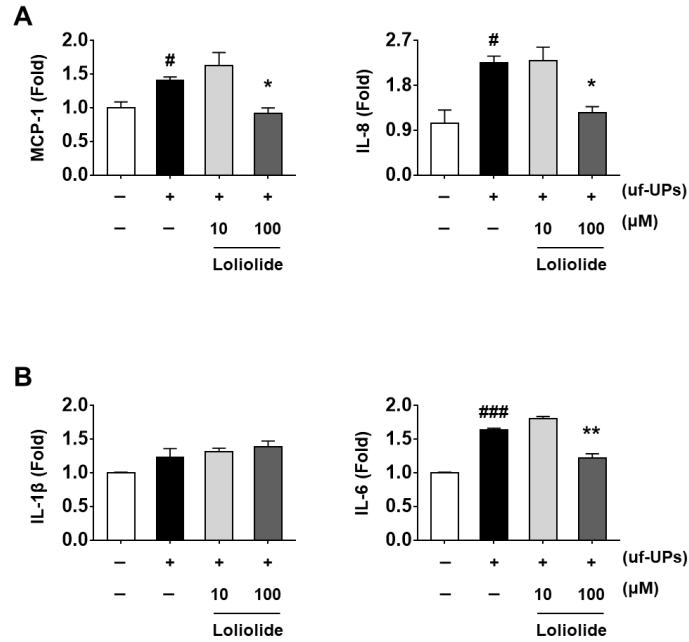

**Figure S4.** Effect of loliolide on mRNA expression levels of inflammation marker in uf-UPs-treated ARPE-19 cells. ARPE-19 cells were pre-treated with loliolide (10, 100  $\mu$ M) for 1 h and then treated with 10  $\mu$ g/mL uf-UPs for 1 h. mRNA expression levels of (A) chemokine *MCP-1* and *IL-8* and (B) cytokine *IL-1 $\beta$*  and *IL-6*. The values represent the mean  $\pm$  SD of three independent experiments. #  $p < 0.05$  and ###  $p < 0.001$  compared with the control. \*  $p < 0.05$  and \*\*  $p < 0.01$  compared with the uf-UPs-treated control, respectively.
